# Supplementary material
Source: publisher site journal article supplement (https://www.dovepress.com/article/supplementary_file/616277/616277%20Revised%20Supplementary%20Materials.docx)
Supplement: Supplementary file 1 [file 616277%20Revised%20Supplementary%20Materials.docx]

# Supplementary Materials

*Diagnostic Value of Bilateral Pectoralis Major Total Cross-Sectional Area*

*in Patients with AECOPD Complicated by Malnutrition*

**Manuscript ID: 616277**

International Journal of COPD

Dovepress, Taylor & Francis Group

**Supplementary Table S1**. Multicollinearity diagnostics before and after variable selection

| Variable | VIF(before) | VIF(after) |
| --- | --- | --- |
| MAC | 11.88 | 1.71 |
| CC | 9.39 | -(excluded) |
| NRS2002 | 2.26 | -(excluded) |
| FVC | 3.07 | -(excluded) |
| FEV1 | 9.08 | -(excluded) |
| FEV1pre | 9.88 | -(excluded) |
| GLOD | 8.62 | -(excluded) |
| mMRC | 5.62 | -(excluded) |
| CAT | 4.20 | -(excluded) |
| TP | 8.24 | -(excluded) |
| ALB | 8.96 | 1.47 |
| PNI | 2.97 | -(excluded) |
| CRP | 379.12 | -(excluded) |
| CAR | 383.15 | -(excluded) |
| Left PMA | - | -(excluded) |
| Right PMA | 14.81 | -(excluded) |
| tMPA | 14.80 | 1.44 |
| Total model | 54.75 | 1.54 |

NRS2002: Nutrition Risk Screening 2002; MAC: Upper Arm Circumference; CC: Calf Circumference; FVC: Forced Vital Capacity; FEV1: Forced Expiratory Volume in 1 Second; FEV1pre: FEV1 as a percentage of predicted value; GLOD: Global Initiative for Chronic Obstructive Lung Disease; mMRC: Modified Medical Research Council Dyspnea Scale; CAT: COPD Patient Self-Assessment Questionnaire; TP Total protein; ALB Albumin; CRP C-reactive protein; CAR C-reactive protein/albumin ratio; PNI: Prognostic Nutritional Index; LAC: Lactate; Left PMA: Left Pectoralis Major Muscle Cross-sectional Area; Right PMA: Right Pectoralis Major Muscle Cross-sectional Area; tPMA: Total Pectoralis Major Muscle Cross-sectional Area;

Note: Variables were sequentially removed based on clinical relevance and VIF magnitude. First, CRP and CAR were removed due to excessively high VIF values; since tPMA is similar to the cross-sectional areas of the left and right pectoralis major muscles, and tPMA is a more representative measure of the study subjects, the cross-sectional areas of the left and right pectoralis major muscles were excluded; MAC and CC were similar and highly collinear; since MAC is more commonly used clinically, CC was excluded; PNI is calculated from ALB and lymphocytes; since ALB is more commonly used clinically and TP also belongs to the protein group, PNI and TP were excluded; in the pulmonary function group, FEV1 is more representative, so FVC, FEV1pre, and GLOD were excluded; Symptoms/ Other group: The NRS2002 score includes the BMI factor, which introduces confounding with the malnutrition grouping (based on BMI), so it was excluded; mMRC is correlated with CAT, so it was excluded, leaving only CAT; According to the EPV principle, the final model should contain only 3 variables, and tPMA is the study subject, so it was retained; MAC is moderately correlated with tPMA (r = 0.52), ALB, CAT, and FEV1 showed weak correlations with tPMA (r = 0.38, 0.32, and 0.38, respectively). However, since MAC represents peripheral muscle status, ALB represents visceral protein status, and CAT and FEV1 represent disease symptoms and lung function, respectively, the final model includes tPMA, MAC, and ALB. The VIF values for all variables were <5, and the EPV was ≥10.

**Supplementary Table S2.** Multivariate Logistic Regression Analysis of Factors Associated with Malnutrition in Patients with AECOPD (Nested Model) (Continuous variables and OR values have been standardized)

| variable | Model 1 | Model 2 | Model 3# | Model 4 |
| --- | --- | --- | --- | --- |
|  | OR(95%CI) | OR(95%CI) | OR(95%CI) | OR(95%CI) |
| tPMA | 0.302***  (0.165-0.550) | 0.256***  (0.136-0.482) | 0.357*  (0.146-0.873) | 0.343*  (0.135-0.872) |
| Age | - | 0.802(0.500-1.288) | 1.444(0.721-2.891) | 1.349(0.643-2.830) |
| Sex | - | 0.644 (0.399-1.039) | 0.428(0.220-0.833)* | 0.405 (0.203-0.806)** |
| MAC | - | - | 0.456(0.198-1.054) | 0.596(0.253-1.402)* |
| ALB | - | - | 0.047***  (0.012-0.189) | 0.049***  (0.012-0.203) |
| CAT | - | - | - | 2.166 (1.058-4.435)* |
|  |  |  |  |  |
| Pseudo R2 | 0.149 | 0.180 | 0.493 | 0.525 |
| Log likelihood | -62.54 | -60.21 | -37.24 | -34.78 |

CAT: COPD Patient Self-Assessment Questionnaire; ALB Albumin; MAC: Upper Arm Circumference; tPMA: Total Pectoralis Major Muscle Cross-sectional Area;

Model 1: Unadjusted;

Model 2: Model 1 adjusted for gender and age;

Model 3 (Final Model): Model 2 adjusted for MAC and ALB;

Model 4 (Sensitivity Analysis): Model 3 adjusted for CAT;

*P<0.05, **P<0.01, ***P<0.001;

#The model showed good calibration according to the Hosmer-Lemeshow test (χ² = 3.56, P = 0.895)
